# Supplementary material
Source: Royal Society of Chemistry journal article supplement (doi:10.1039/d6dd00247a)
Supplement: d6dd00247a1.pdf [file d6dd00247a1.pdf]

## SUPPLEMENTARY INFORMATION

# A reproducible Python workflow for absorber–light-source spectral matching: overlap-calculator

Pinar Seyitdanlioglu<sup>\*a</sup>

Department of Chemistry, Faculty of Science, Hacettepe University, Ankara, Turkiye

### S1. Scope of the Supplementary Information

The main manuscript describes the scientific motivation, workflow concept, descriptor definitions, and demonstration results. This document records the technical details required to reproduce and audit the reported analysis:

- the exact input manifest used for the demonstration run;
- runtime parameters and default light-source selections;
- the treatment of theoretical and spreadsheet-based spectra;
- additional notes on broadening, absorptance conversion, and overlap metrics;
- output-file inventory and ranking-table interpretation;
- command-line, API, Docker, and test commands used to verify the workflow.

The supplementary material is intended to function as a practical reproducibility record rather than a replacement for the full user manual distributed with the software.

**Table S1** Functional comparison of overlap-calculator with commonly used molecular post-processing or scripting

| Feature                                     | Multiwfn <sup>1</sup><br>GUI/script workflow | ORCA <sup>2</sup> -related<br>tools | ASE <sup>3</sup> /custom Python<br>scripts | overlap-calculator                                                   |
|---------------------------------------------|----------------------------------------------|-------------------------------------|--------------------------------------------|----------------------------------------------------------------------|
| TD-DFT transition parsing                   | Available through GUI or scripted analysis   | Native for ORCA-type outputs        | Requires manual/custom parsing             | Native batch parsing of Gaussian TD-DFT outputs                      |
| Light-source overlap analysis               | Not built in                                 | Not built in                        | Requires manual implementation             | Built-in spectral-overlap descriptors                                |
| Indoor LED/fluorescent light-source library | Not built in                                 | Not built in                        | Not built in                               | Built-in CIE LED, CIE fluorescent, and AM1.5G support                |
| CSV/XLSX experimental UV-vis input          | Not designed as a direct batch input branch  | Not built in                        | Requires custom formatting and scripts     | Built-in CSV/XLSX spreadsheet input support                          |
| Batch manifest-based execution              | Not native                                   | Limited or workflow-specific        | Manual/custom setup                        | Native input.json manifest workflow                                  |
| Reproducible command-line workflow          | Partly possible through scripting            | Tool-dependent                      | Manual scripting required                  | Built-in CLI workflow                                                |
| HTTP API / service deployment               | Not available                                | Not available                       | Not available unless custom-developed      | Flask API and Docker-supported deployment                            |
| Structured output tables and plots          | Requires user-defined export steps           | Tool-dependent                      | Manual/custom export                       | Built-in CSV, JSON, XLSX, timing, skip-report, and TIFF plot outputs |

approaches for spectral analysis.

## S2. Demonstration Input Manifest

The manuscript demonstration used a mixed manifest containing five Gaussian TD-DFT output files and eight spreadsheet-based UV-vis spectra. The theoretical inputs were parsed from Gaussian output files.<sup>4</sup> The spreadsheet spectra were read from an Excel workbook in which each named molecule is treated as an independent spectral series.

**Table S2.** Input entries used in the manuscript demonstration.

| Input family | Sample identifier | Source file                                   | Sheet name               | Series name  |
|--------------|-------------------|-----------------------------------------------|--------------------------|--------------|
| Theoretical  | 3e_td             | files/slurm-2829207.out                       |                          |              |
| Theoretical  | 3f_td             | files/slurm-2829212.out                       |                          |              |
| Theoretical  | 3g_td             | files/slurm-2829256.out                       |                          |              |
| Theoretical  | 4c_td             | files/slurm-2829260.out                       |                          |              |
| Theoretical  | 4g_td             | files/slurm-2829265.out                       |                          |              |
| Spreadsheet  | Coumarin_1        | files/organic_uvvis_photochemcad_dataset.xlsx | program_input_absorbance | Coumarin_1   |
| Spreadsheet  | Coumarin_6        | files/organic_uvvis_photochemcad_dataset.xlsx | program_input_absorbance | Coumarin_6   |
| Spreadsheet  | Coumarin_314      | files/organic_uvvis_photochemcad_dataset.xlsx | program_input_absorbance | Coumarin_314 |
| Spreadsheet  | Fluorescein       | files/organic_uvvis_photochemcad_dataset.xlsx | program_input_absorbance | Fluorescein  |
| Spreadsheet  | Rhodamine_B       | files/organic_uvvis_photochemcad_dataset.xlsx | program_input_absorbance | Rhodamine_B  |
| Spreadsheet  | Rhodamine_6G      | files/organic_uvvis_photochemcad_dataset.xlsx | program_input_absorbance | Rhodamine_6G |
| Spreadsheet  | Eosin_Y           | files/organic_uvvis_photochemcad_dataset.xlsx | program_input_absorbance | Eosin_Y      |

|             |        |                                                |                          |        |
|-------------|--------|------------------------------------------------|--------------------------|--------|
| Spreadsheet | Pyrene | files/organic_uvvis_photochem_cad_dataset.xlsx | program_input_absorbance | Pyrene |
|-------------|--------|------------------------------------------------|--------------------------|--------|

The corresponding JSON manifest is distributed as input/input.json.

### S3. Runtime Parameters

All calculations reported in the manuscript were generated using the default wavelength grid and Beer-Lambert reference settings unless otherwise stated.

**Table S3.** Runtime settings used for the reported demonstration output.

| Parameter               | Value                           | Role                                                                                                                      |
|-------------------------|---------------------------------|---------------------------------------------------------------------------------------------------------------------------|
| Wavelength minimum      | 200 nm                          | Lower integration and plotting bound                                                                                      |
| Wavelength maximum      | 800 nm                          | Upper integration and plotting bound                                                                                      |
| Grid points             | 10000                           | Shared interpolation and integration grid                                                                                 |
| Broadening width        | 0.30 eV                         | Gaussian and Lorentzian broadening parameter for TD-DFT transitions                                                       |
| Reference concentration | 1e-5 M                          | Beer-Lambert concentration for TD-DFT-derived spectra                                                                     |
| Reference path length   | 1.0 cm                          | Beer-Lambert optical path length                                                                                          |
| Default light sources   | AM15G,LEDB4,LEDB2,LEDB3,CIEFL10 | Built-in solar, LED, and fluorescent spectra                                                                              |
| Plot resolution         | 400 dpi                         | Default TIFF export resolution                                                                                            |
| Ranking outputs         | enabled                         | Exports grouped ranking tables and plots                                                                                  |
| Prefactor mode          | constant                        | integrated-intensity convention; frequency-resolved keeps the $\tilde{\nu}$ factor inside the integrand (NIR).            |
| Sigma mode              | fixed                           | fixed uses --sigma-ev; marcus-hush sets $\sigma=\nu(2\lambda k_{BT})$ from --reorganization-ev and --temperature-k.       |
| Calibration TOML        | (none)                          | optional --calibration applying $E_{cal}=a * E+b$ , $f_{cal}=\alpha * f$ , per-band overrides; identity is bit-identical. |

The principal command-line run is:

```
overlap-calculator analyze \
  --input input/input.json \
  --out output \
  --sigma-ev 0.30 \
  --wl-min 200 \
  --wl-max 800 \
  --num-points 10000 \
  --concentration-m 1e-5 \
  --path-cm 1.0 \
  --default-light-sources AM15G,LEDB2,LEDB3,LEDB4,CIEFL10
```

### S4. Treatment of Theoretical and Spreadsheet Spectra

For theoretical inputs, Gaussian TD-DFT excited-state wavelengths and oscillator strengths are parsed from .out or .log files. Each transition is reconstructed on the common wavelength grid using both Gaussian and Lorentzian line-shape functions. The two broadened spectra are retained separately throughout descriptor calculation and export.

The five Gaussian TD-DFT output files were generated in a previous OPV screening study by the author at the B3LYP/6-31G level of theory and are reused here only as representative calculated-spectra inputs for validating the overlap-calculator workflow.<sup>5</sup> No new quantum-chemical calculations are claimed for these absorbers in the present work.

For spreadsheet inputs, the numeric spectral series is treated as an absorbance-like signal with a wavelength axis. Each numeric series column can be analysed as a distinct sample. The demonstration spreadsheet was prepared from public organic UV-vis molar absorptivity spectra and transformed into absorbance-like profiles before ingestion. These spreadsheet spectra are used to demonstrate the tabular-input branch of the workflow and are not used as an experimental validation set for the TD-DFT candidates.

**Table S4.** Input branch behaviour.

| <b>Input branch</b> | <b>Accepted files</b> | <b>Internal spectral quantity before absorptance</b>        | <b>Broadening outputs</b>                                        |
|---------------------|-----------------------|-------------------------------------------------------------|------------------------------------------------------------------|
| Theoretical         | Gaussian .out / .log  | Molar extinction coefficient reconstructed from transitions | Gaussian and Lorentzian                                          |
| Spreadsheet         | .csv, .xlsx, .xls     | User-provided absorbance-like signal                        | Direct absorbance branch; exported in the common table structure |

## 55. Spectral Reconstruction and Absorptance

For a TD-DFT transition  $i$  with excitation wavelength  $\lambda_i$  and oscillator strength  $f_i$ , the wavelength axis was first converted to a wavenumber scale according to

$$\tilde{\nu}(\lambda) = \frac{10^7}{\lambda}$$

where  $\lambda$  is given in nm and  $\tilde{\nu}$  is obtained in  $\text{cm}^{-1}$ . The transition centre is therefore

$$\tilde{\nu}_i = \frac{10^7}{\lambda_i}$$

Each transition was represented on the common wavelength grid using either a Gaussian or Lorentzian line-shape function. The Gaussian profile was defined as

$$g_i(\tilde{\nu}) = \frac{1}{\sigma\sqrt{2\pi}} \exp\left[-\frac{(\tilde{\nu} - \tilde{\nu}_i)^2}{2\sigma^2}\right],$$

whereas the Lorentzian profile was defined as

$$l(\tilde{\nu}) = \frac{1}{\pi} \frac{\gamma}{(\tilde{\nu} - \tilde{\nu}_i)^2 + \gamma^2}$$

$$\gamma = 2\ln 2\sigma \approx 1.1774\sigma$$

The reconstructed molar absorptivity spectrum was then obtained as the oscillator-strength-weighted sum of the broadened transitions:

$$\varepsilon(\lambda) = 2.315 \times 10^8 \sum_i f_i P_i(\tilde{\nu}(\lambda)),$$

where  $P_i$  denotes either  $G_i$  or  $L_i$ , depending on the selected broadening model. The resulting  $\varepsilon(\lambda)$  values are expressed in  $\text{M}^{-1} \text{cm}^{-1}$ .

For TD-DFT-derived spectra, absorbance was calculated using the Beer–Lambert relation:

$$A_{\text{TD-DFT}}(\lambda) = \varepsilon(\lambda)cL,$$

where  $c$  is the reference concentration and  $L$  is the optical path length. The corresponding wavelength-dependent absorptance was calculated as

$$\alpha_{\text{TD-DFT}}(\lambda) = 1 - 10^{-A_{\text{TD-DFT}}(\lambda)} = 1 - 10^{-\varepsilon(\lambda)cL}.$$

For spreadsheet-based spectra, the user-provided absorbance-like signal  $A_{\text{user}}(\lambda)$  was inserted directly into the same absorptance definition:

$$\alpha_{\text{spreadsheet}}(\lambda) = 1 - 10^{-A_{\text{user}}(\lambda)}.$$

## 56. Light Sources and Units

The demonstration uses one absolute solar spectrum and four relative indoor illuminant spectra.<sup>6-10</sup>

**Table S5.** Light-source definitions used in the demonstration.

| Light source | Source type                                | Output unit label                  |
|--------------|--------------------------------------------|------------------------------------|
| AM15G        | ASTM G-173 AM1.5 global reference spectrum | W m <sup>-2</sup> nm <sup>-1</sup> |
| LEDB2        | CIE LED illuminant data                    | relative                           |
| LEDB3        | CIE LED illuminant data                    | relative                           |
| LEDB4        | CIE LED illuminant data                    | relative                           |
| CIEFL10      | CIE fluorescent illuminant data            | relative                           |

For AM1.5G, absorbed\_flux is expressed as an integrated irradiance-like quantity over the selected wavelength grid. For relative CIE light-source spectra, the absolute scale is arbitrary, so absorbed\_fraction and shape\_overlap are generally more appropriate for ranking samples under the same light source.

### S7. Overlap Descriptors

For each sample and light source, the workflow calculates:

$$\begin{aligned} \text{absorbed\_flux} &= \int \alpha(\lambda) I(\lambda) d(\lambda) \\ \text{light\_flux\_total} &= \int I(\lambda) d(\lambda) \\ \text{absorbed\_fraction} &= \text{absorbed\_flux} / \text{light\_flux\_total} \\ \text{shape\_overlap} &= \frac{\int \min(\hat{\alpha}(\lambda), \hat{I}(\lambda)) d(\lambda)}{\int \hat{I}(\lambda) d(\lambda)} \end{aligned}$$

Here  $I(\lambda)$  is the light-source spectrum, and hats indicate max-normalised profiles. absorbed\_fraction is intensity-weighted and bounded between 0 and 1 for non-negative inputs. shape\_overlap is a dimensionless spectral matching descriptor that emphasises relative alignment between absorbance and the light-source emission shape. However, shape\_overlap can approach unity when the normalised absorption envelope completely covers the normalised light-source envelope, that is, when  $\hat{\alpha}(\lambda) \geq \hat{I}(\lambda)$  over the wavelength region where  $\hat{I}(\lambda) > 0$ . For very strongly absorbing molecules, this behaviour may compress the metric near unity. In such cases, absorbed\_fraction can provide additional discrimination because it explicitly retains the Beer–Lambert absorption strength. For this reason, the two metrics are reported together as complementary descriptors rather than as interchangeable alternatives.

### S8. Output Inventory

The manuscript demonstration generated 65 result rows: 25 theoretical rows and 40 spreadsheet-input rows. Each of the 13 samples was evaluated under five light sources.

**Table S6.** Main output files generated under output/tables/.

| Output file family                | Formats         | Description                                                                                                                                                                                      |
|-----------------------------------|-----------------|--------------------------------------------------------------------------------------------------------------------------------------------------------------------------------------------------|
| results                           | CSV, JSON, XLSX | Main row-wise descriptor table for each sample-light pair                                                                                                                                        |
| descriptor_summary                | CSV, XLSX       | Condensed ranked summary table                                                                                                                                                                   |
| results_timings                   | CSV, JSON, XLSX | Runtime timing information for parsing, broadening, light-source handling, descriptor calculation, and plotting                                                                                  |
| ranking_by_light_source__<metric> | CSV, JSON, XLSX | Per-light-source sample ranking for each metric                                                                                                                                                  |
| ranking_by_sample__<metric>       | CSV, JSON, XLSX | Per-sample light-source ranking for each metric                                                                                                                                                  |
| run_manifest.json                 | JSON            | Per-run provenance manifest at the output root: software_version, git_commit, generated_at_utc (ISO-8601 UTC), the full resolved parameter set including the calibration block, the light-source |

|  |  |                                                                                                                       |
|--|--|-----------------------------------------------------------------------------------------------------------------------|
|  |  | set, one entry per (source, sample, series, sheet) with the SHA-256 of each input file, results_count, skipped_count. |
|--|--|-----------------------------------------------------------------------------------------------------------------------|

Every run also writes a single run\_manifest.json in the output root; result rows additionally carry prefactor\_mode, sigma\_mode, and software\_version columns.

The ranking metric families are:

- gaussian\_absorbed\_fraction
- lorentzian\_absorbed\_fraction
- gaussian\_shape\_overlap
- lorentzian\_shape\_overlap

The run also generated 497 TIFF plots under output/plots/, including absorption plots, light-source plots, overlap plots, overlays, and grouped ranking bar charts.

### S9. Additional Ranking Summary

The main text discusses source-dependent changes in candidate ranking. Table S7 gives the top three samples under each light source using Gaussian shape\_overlap.

**Table S7.** Top-ranked samples by Gaussian shape overlap.

| Light source | Rank 1         | Rank 2         | Rank 3         |
|--------------|----------------|----------------|----------------|
| AM15G        | 4c_td (0.7952) | 3e_td (0.7173) | 3g_td (0.6437) |
| CIEFL10      | 4c_td (0.9852) | 3g_td (0.9724) | 3e_td (0.9664) |
| LEDB2        | 4c_td (0.9503) | 3e_td (0.9439) | 3f_td (0.9185) |
| LEDB3        | 3e_td (0.9514) | 4c_td (0.9492) | 3g_td (0.9333) |
| LEDB4        | 4c_td (0.9643) | 3g_td (0.9536) | 3e_td (0.9374) |

These rankings illustrate why the manuscript avoids assigning a single universal optical ranking to all absorbers. Instead, the preferred candidate depends on the intended illumination environment and the selected descriptor family.

### S10. Reproducibility Commands

The input manifest can be generated from the raw input directory:

```
overlap-calculator generate-input \
  --files-dir input/files \
  --out input/input.json
```

The full analysis can then be rerun from the manifest:

```
overlap-calculator analyze \
  --input input/input.json \
  --out output
```

To reproduce a table-only run without plot generation:

```
overlap-calculator analyze \
  --input input/input.json \
  --out output_table_only \
  --no-plot-outputs
```

To change only the plot resolution:

```
overlap-calculator analyze \  
  --input input/input.json \  
  --out output_600dpi \  
  --plot-dpi 600
```

### S11. HTTP API Reproduction

The same analysis logic is exposed through a Flask HTTP API. A minimal API health check is:

```
curl http://localhost:8000/health
```

A multipart analysis request can be sent as:

```
curl -X POST http://localhost:8000/analyze \  
  -F "files=@input/files/slurm-2829207.out" \  
  -F "files=@input/files/organic_uvvis_photochemcad_dataset.xlsx" \  
  -F "sigma_ev=0.30" \  
  -F "default_light_sources=AM15G,LEDB4" \  
  --output analysis_outputs.zip
```

The response archive contains the same table and plot hierarchy as the command-line workflow.

### S12. Software Environment

The package is distributed as overlap-calculator version 1.1.1 and requires Python  $\geq 3.12, < 3.13$ . The principal runtime dependencies are pinned in pyproject.toml.

**Table S8.** Main runtime dependencies.

| Package           | Version |
|-------------------|---------|
| numpy             | 2.1.1   |
| pandas            | 2.2.2   |
| pydantic          | 2.8.2   |
| pydantic-settings | 2.4.0   |
| matplotlib        | 3.9.2   |
| openpyxl          | 3.1.5   |
| flask             | 3.0.3   |
| typer             | 0.12.3  |
| click             | 8.1.7   |

The recommended local installation is:

```
conda env create -f environment.yml  
conda activate overlap-calculator  
pip install -e .
```

The Docker build route is:

```
docker build -t overlap-calculator .  
docker run --rm -p 8080:8000 overlap-calculator
```

### S13. Test and Case-Study Coverage

The repository contains unit tests covering TD-DFT parsing, spectrum metrics, light-source loading, input generation, CLI behaviour, API helpers, export structure, and batch skip handling. [Additional tests in](#)

test\_broadening\_calibration\_provenance cover the revised broadening modes, calibration block, prefactor-mode handling, and run-manifest provenance fields. The test suite can be run with:

python -m pytestThe repository also includes worked case studies under case\_studies/:

```
01_theoretical_only
02_experimental_only
03_mixed_theory_experiment
04_custom_light_source
05_default_light_source_selection
06_plot_dpi
07_table_only
08_broadening_sigma
09_beer_lambert_tuning
10_wavelength_grid
11_sheet_overrides
```

```
12_frequency_resolved_prefactor
```

```
13_marcus_hush_width
```

```
14_calibration_block
```

```
15_vibronic_tabular_branch
```

These examples are intended to document the expected behaviour of individual workflow branches and user-facing options.

#### **S14. Notes on Interpretation**

The reported descriptors are optical compatibility descriptors. They should not be interpreted as device efficiency, external quantum efficiency, short-circuit current density, power-conversion efficiency, or long-term stability. They also do not include exciton diffusion, charge generation, morphology, optical interference in multilayer stacks, electrode losses, or recombination.

The purpose of the workflow is to make a recurring spectral-overlap post-processing step explicit, reproducible, and comparable across molecule sets and light sources. The descriptors are therefore most useful for early-stage screening, prioritisation, and transparent comparison of optical compatibility under a defined illumination condition.

#### **Supplementary References**

1. T. Lu and F. Chen, *J. Comput. Chem.*, 2012, **33**, 580–592.
2. F. Neese, F. Wennmohs, U. Becker and C. Riplinger, *J. Chem. Phys.*, 2020, **152**, 224108.
3. A. H. Larsen, J. J. Mortensen, J. Blomqvist, I. E. Castelli, R. Christensen, M. Dułak *et al.*, *J. Phys.: Condens. Matter*, 2017, **29**, 273002.

4. M. J. Frisch, G. W. Trucks, H. B. Schlegel, G. E. Scuseria, M. A. Robb, J. R. Cheeseman, G. Scalmani, V. Barone, G. A. Petersson, H. Nakatsuji, X. Li, M. Caricato, A. V. Marenich, J. Bloino, B. G. Janesko, R. Gomperts, B. Mennucci, H. P. Hratchian, J. V. Ortiz, A. F. Izmaylov, J. L. Sonnenberg, D. Williams-Young, F. Ding, F. Lipparini, F. Egidi, J. Goings, B. Peng, A. Petrone, T. Henderson, D. Ranasinghe, V. G. Zakrzewski, J. Gao, N. Rega, G. Zheng, W. Liang, M. Hada, M. Ehara, K. Toyota, R. Fukuda, J. Hasegawa, M. Ishida, T. Nakajima, Y. Honda, O. Kitao, H. Nakai, T. Vreven, K. Throssell, J. A. Montgomery Jr., J. E. Peralta, F. Ogliaro, M. J. Bearpark, J. J. Heyd, E. N. Brothers, K. N. Kudin, V. N. Staroverov, T. A. Keith, R. Kobayashi, J. Normand, K. Raghavachari, A. P. Rendell, J. C. Burant, S. S. Iyengar, J. Tomasi, M. Cossi, J. M. Millam, M. Klene, C. Adamo, R. Cammi, J. W. Ochterski, R. L. Martin, K. Morokuma, O. Farkas, J. B. Foresman and D. J. Fox, Gaussian 16, Revision C.02, Gaussian, Inc., Wallingford CT, 2019.

5. P. Seyitdanlioglu, *J. Mol. Model.*, 2026, **32**, 8.

6. M. Taniguchi and J. S. Lindsey, Database of absorption and fluorescence spectra of >300 common compounds for use in PhotochemCAD, *Photochem. Photobiol.*, 2018, *94*, 290-327.

7. International Commission on Illumination, Relative spectral power distributions of illuminants representing typical LED lamps, 1 nm spacing, CIE Central Bureau, Vienna, 2018, DOI: 10.25039/CIE.DS.dhcw57sd.

8. International Commission on Illumination, Relative spectral power distributions of illuminants representing typical fluorescent lamps, 1 nm wavelength steps, CIE Central Bureau, Vienna, 2018, DOI: 10.25039/CIE.DS.54hy6srn.

9. International Commission on Illumination, CIE 015:2018 Colorimetry, 4th edn, CIE Central Bureau, Vienna, 2018.

10. National Renewable Energy Laboratory, Reference Air Mass 1.5 Spectra (ASTM G-173-03), U.S. Department of Energy.
